# Supplementary material
Source: PubMed Central journal article supplement (PMC4253491)
Supplement: embr0015-1175-sd3.pdf [file embr0015-1175-sd3.pdf]

Manuscript EMBOR-2014-39195

## **HDAC4 promotes Pax7-dependent satellite cell activation and muscle regeneration**

Moon-Chang Choi, Soyoung Ryu, Rui Hao, Bin Wang, Meghan Kapur, Chen-Ming Fan and Tso-Pang Yao

*Corresponding author: Tso-Pang Yao, Duke University*

---

### **Review timeline:**

Resubmission date:

20 June 2014

Accepted:

14 August 2014

---

### **Transaction Report:**

No Peer Review Process File is available with this article, as the authors have chosen not to make the review process public in this case.
